# Supplementary material
Source: publisher figshare collection journal article supplement (https://tandf.figshare.com/articles/dataset/_/5579725)
Supplement: Supplementary file 1 [file 1]

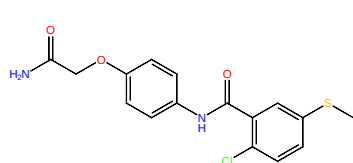

PubChem SID: 1301144  
Fitness: 2.104

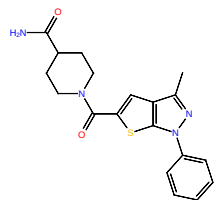

PubChem SID: 1080499  
Fitness: 2.013

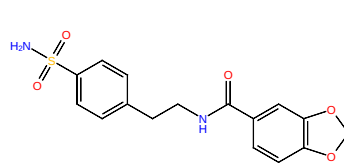

PubChem SID: 742896  
Fitness: 1.993

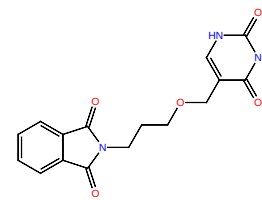

PubChem SID: 373127  
Fitness: 1.986

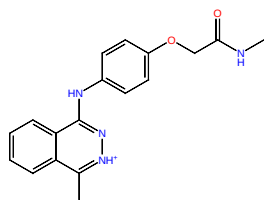

PubChem SID: 16682703  
Fitness: 1.977

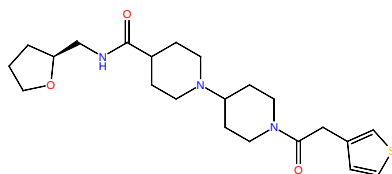

PubChem SID: 16191688  
Fitness: 1.963

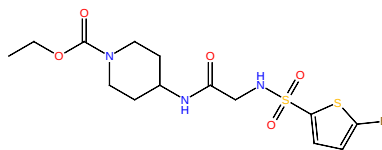

PubChem SID: 3245804  
Fitness: 1.963

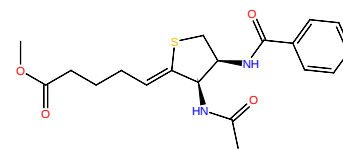

PubChem SID: 15945606  
Fitness: 1.939

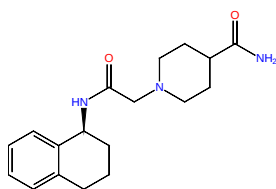

PubChem SID: 3431370  
Fitness: 1.936

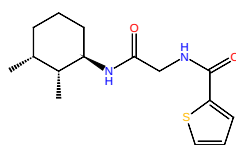

PubChem SID: 4651361  
Fitness: 1.924

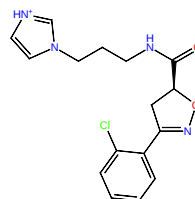

PubChem SID: 2974180  
Fitness: 1.91

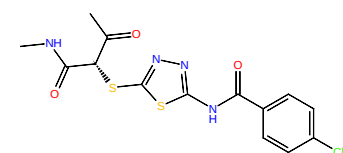

PubChem SID: 2801204  
Fitness: 1.907

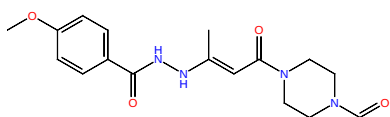

PubChem SID: 3105490  
Fitness: 1.901

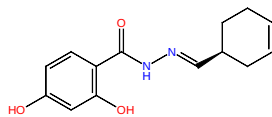

PubChem SID: 2847071  
Fitness: 1.896

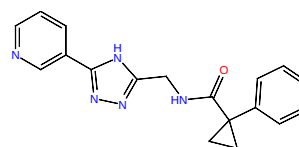

PubChem SID: 16674281  
Fitness: 1.894

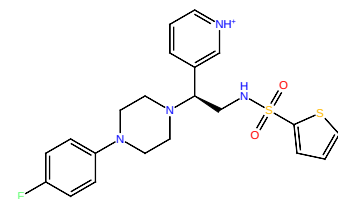

PubChem SID: 4079114  
Fitness: 1.877

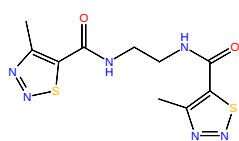

PubChem SID: 2740849  
Fitness: 1.875

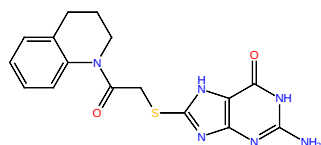

PubChem SID: 6603082  
Fitness: 1.872

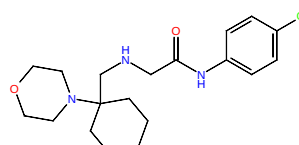

PubChem SID: 2455257  
Fitness: 1.871

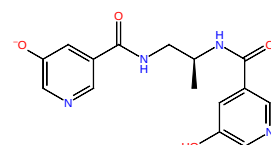

PubChem SID: 6602543  
Fitness: 1.87

**Supplementary figure 2:** 2D structures of 20 compounds from clustering alongwith their fitness score.
