# Supplementary material
Source: publisher figshare collection journal article supplement (https://tandf.figshare.com/articles/dataset/_/5579725)
Supplement: Supplementary file 3 [file 1]

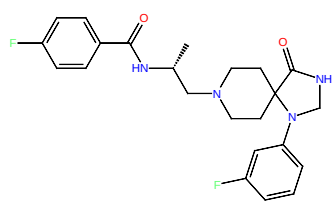

PubChem SID: 164142932  
Fitness: 2.45799

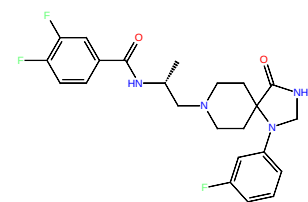

PubChem SID: 164140150  
Fitness: 2.444581

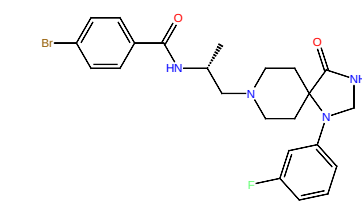

PubChem SID: 164131687  
Fitness: 2.425472

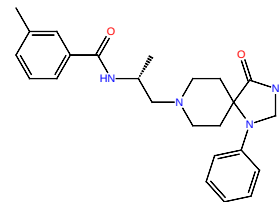

PubChem SID: 103652994  
Fitness: 2.418685

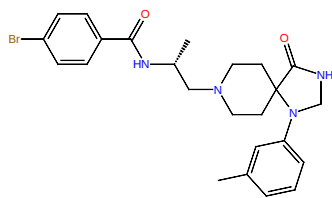

PubChem SID: 164137381  
Fitness: 2.404617

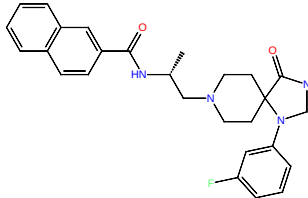

PubChem SID: 123087277  
Fitness: 2.397563

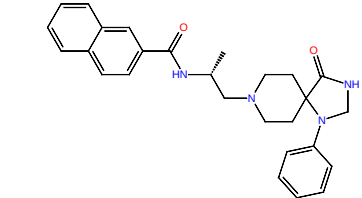

PubChem SID: 103652931  
Fitness: 2.386309

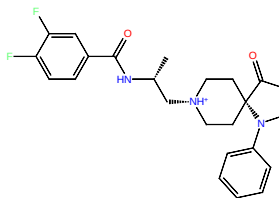

PubChem SID: 103652933  
Fitness: 2.352963

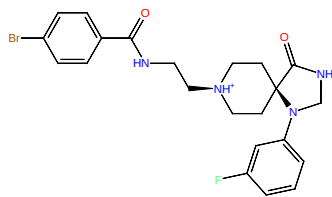

PubChem SID: 164142933  
Fitness: 2.306777

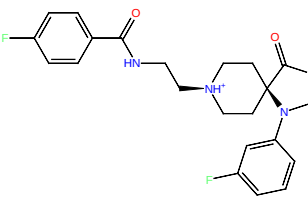

PubChem SID: 123094658  
Fitness: 2.27725

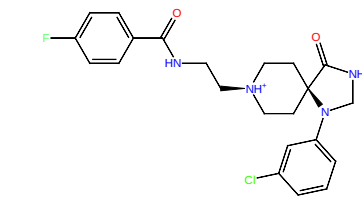

PubChem SID: 123095525  
Fitness: 2.277215

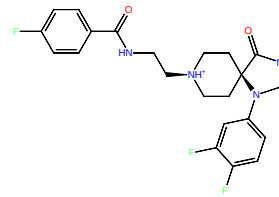

PubChem SID: 123093341  
Fitness: 2.258385

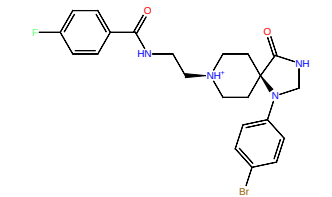

PubChem SID: 123093990  
Fitness: 2.252478

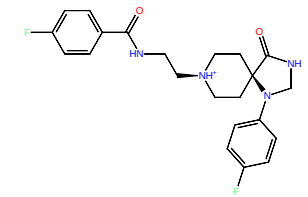

PubChem SID: 123100739  
Fitness: 2.252185

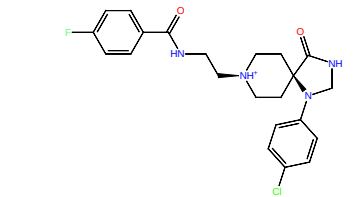

PubChem SID: 123086966  
Fitness: 2.249025

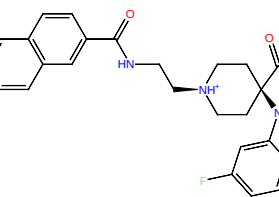

PubChem SID: 123101191  
Fitness: 2.246613

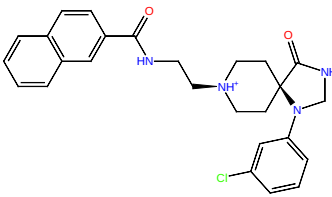

PubChem SID: 123086247  
Fitness: 2.246519

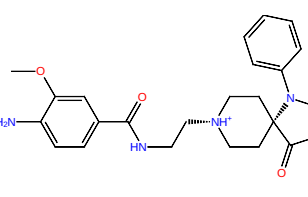

PubChem SID: 103652992  
Fitness: 2.243389

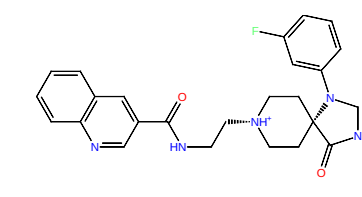

PubChem SID: 123101247  
Fitness: 2.240481

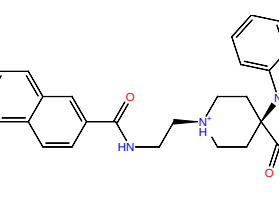

PubChem SID: 103652989  
Fitness: 2.234563

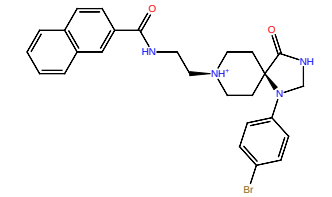

PubChem SID: 123096267  
Fitness: 2.225282

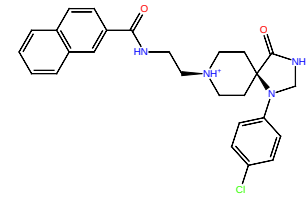

PubChem SID: 123089266  
Fitness: 2.224993

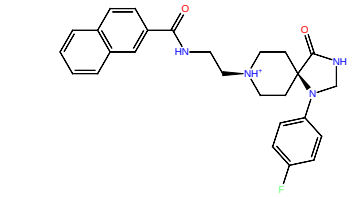

PubChem SID: 123096847  
Fitness: 2.224469

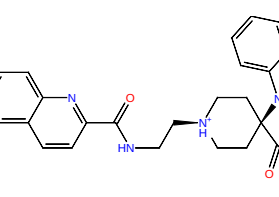

PubChem SID: 103652928  
Fitness: 2.224391

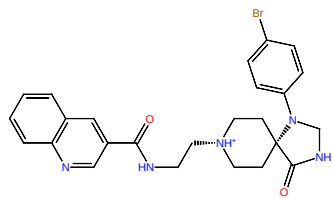

PubChem SID: 123091999  
Fitness: 2.222817

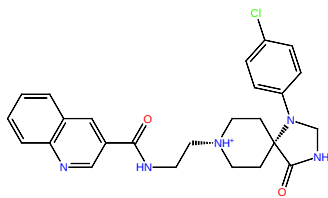

PubChem SID: 123098543  
Fitness: 2.222499

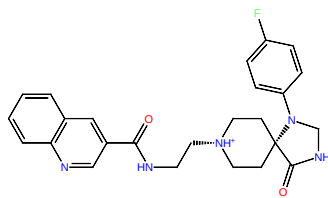

PubChem SID: 123100738  
Fitness: 2.222024

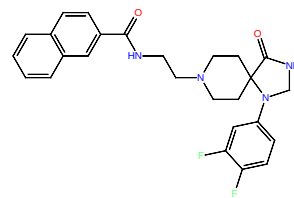

PubChem SID: 123091009  
Fitness: 2.218102

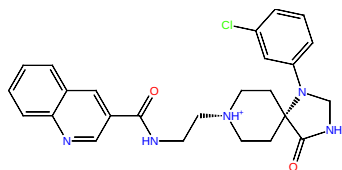

PubChem SID: 123097801  
Fitness: 2.212344

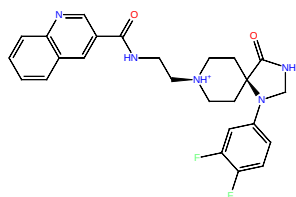

PubChem SID: 123095635  
Fitness: 2.208422

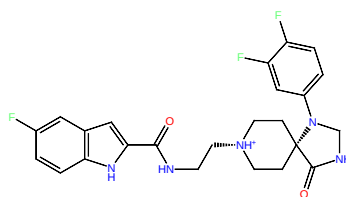

PubChem SID: 123088878  
Fitness: 2.206091

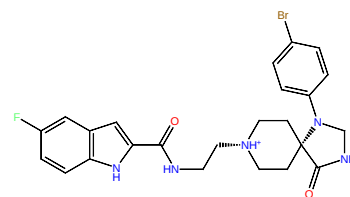

PubChem SID: 123087054  
Fitness: 2.204769

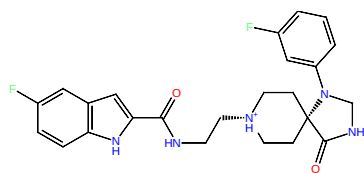

PubChem SID: 123093228  
Fitness: 2.203631

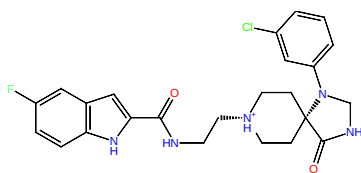

PubChem SID: 123094585  
Fitness: 2.200301

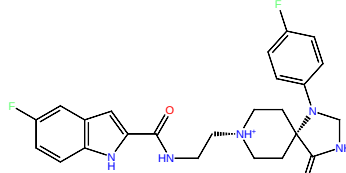

PubChem SID: 123096174  
Fitness: 2.190356

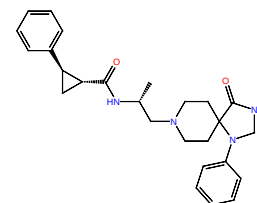

PubChem SID: 103652932  
Fitness: 2.187646

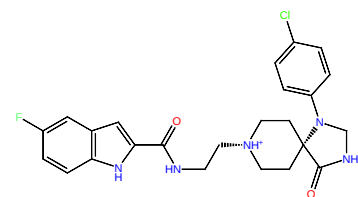

PubChem SID: 123100861  
Fitness: 2.173572

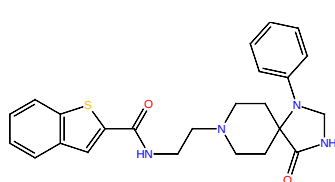

PubChem SID: 103652990  
Fitness: 2.152795

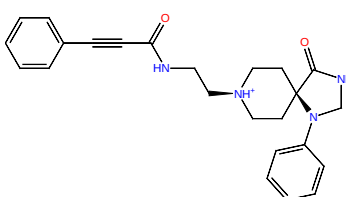

PubChem SID: 103652929  
Fitness: 2.008681

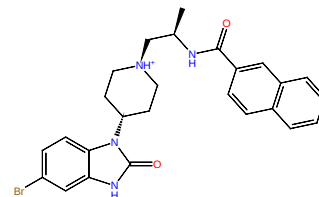

PubChem SID: 103612694  
Fitness: 1.879254

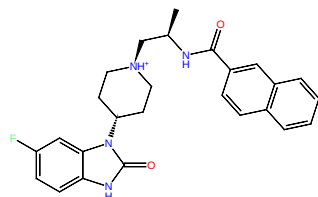

PubChem SID: 103612640  
Fitness: 1.87502

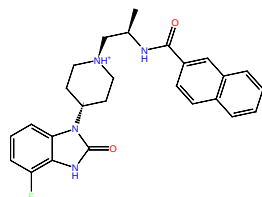

PubChem SID: 103613632  
Fitness: 1.87497

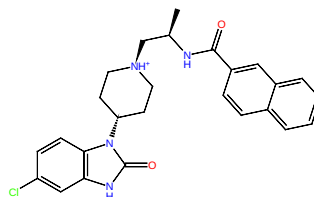

PubChem SID: 103613566  
Fitness: 1.819916

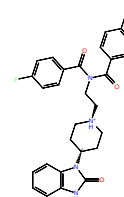

PubChem SID: 104239268  
Fitness: 1.788643

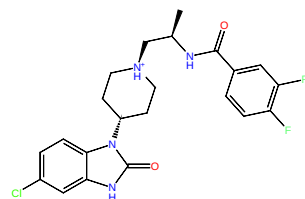

PubChem SID: 103612623  
Fitness: 1.775982

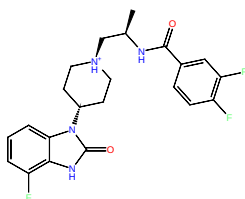

PubChem SID: 103613631  
Fitness: 1.752517

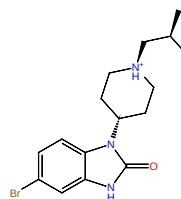

PubChem SID: 103612638  
Fitness: 1.725682

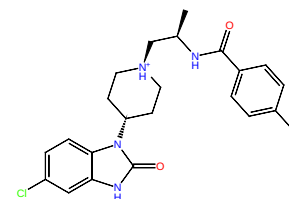

PubChem SID: 103613703  
Fitness: 1.725351

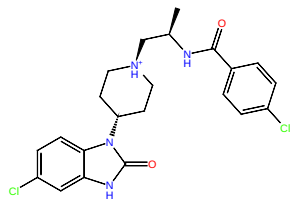

PubChem SID: 103612621  
Fitness: 1.724617

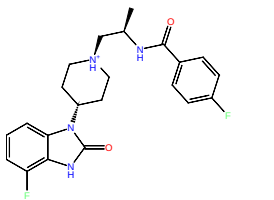

PubChem SID: 103613630  
Fitness: 1.72284

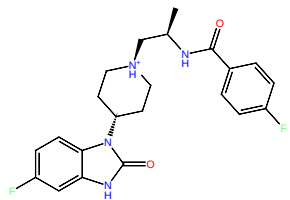

PubChem SID: 103613701  
Fitness: 1.722661

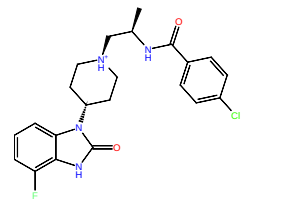

PubChem SID: 103613629  
Fitness: 1.722142

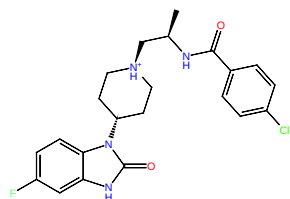

PubChem SID: 103613702  
Fitness: 1.721912

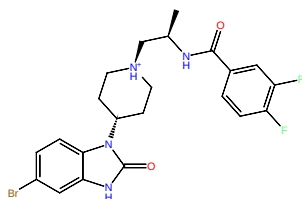

PubChem SID: 103612624  
Fitness: 1.716655

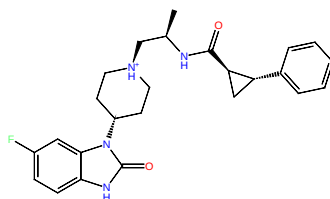

PubChem SID: 103612711  
Fitness: 1.675716

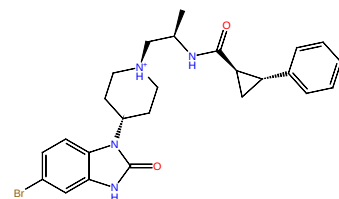

PubChem SID: 103612639  
Fitness: 1.657324

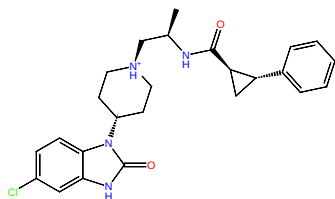

PubChem SID: 103612622  
Fitness: 1.656134

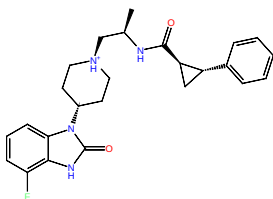

PubChem SID: 103613700  
Fitness: 1.655036

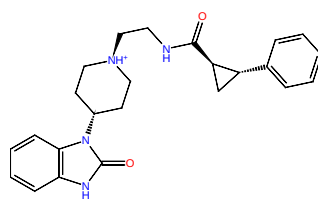

PubChem SID: 103613307  
Fitness: 1.645814

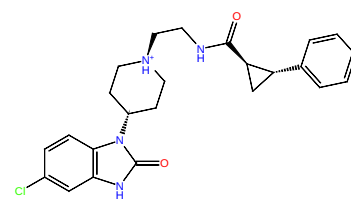

PubChem SID: 164130552  
Fitness: 1.639719

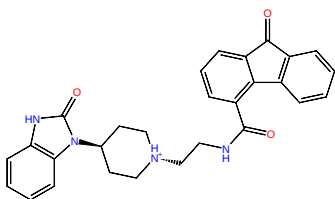

PubChem SID: 104239236  
Fitness: 1.636758

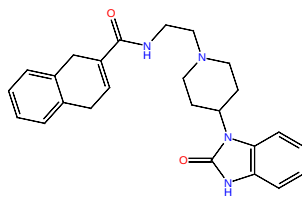

PubChem SID: 103613372  
Fitness: 1.628904

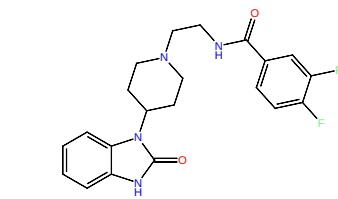

PubChem SID: 104239235  
Fitness: 1.626405

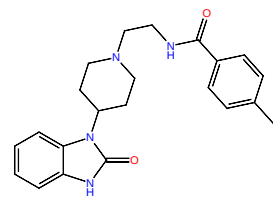

PubChem SID: 104239308  
Fitness: 1.623599

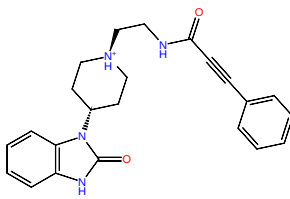

PubChem SID: 103613370  
Fitness: 1.617862

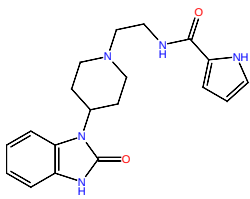

PubChem SID: 104239311  
Fitness: 1.616136

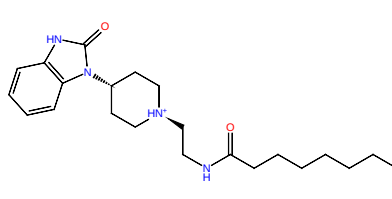

PubChem SID: 104239495  
Fitness: 1.61365

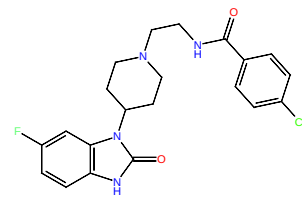

PubChem SID: 103613564  
Fitness: 1.611545

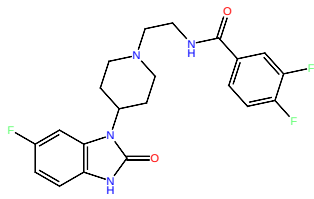

PubChem SID: 103613565  
Fitness: 1.611309

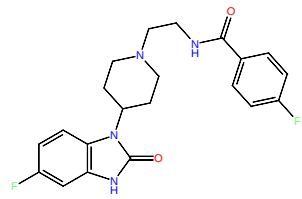

PubChem SID: 103613498  
Fitness: 1.610842

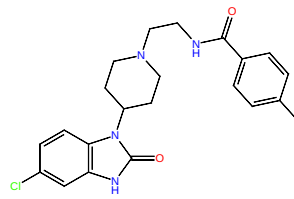

PubChem SID: 103613433  
Fitness: 1.609568

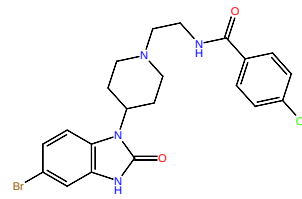

PubChem SID: 103613499  
Fitness: 1.609485

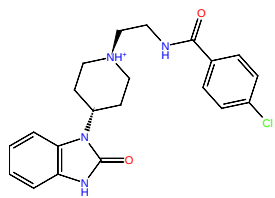

PubChem SID: 104239265  
Fitness: 1.602565

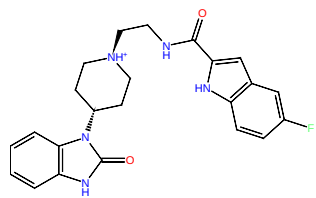

PubChem SID: 103545643  
Fitness: 1.601336

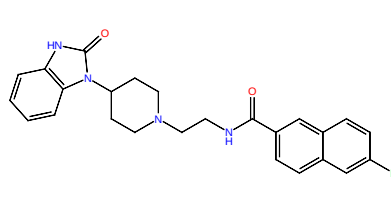

PubChem SID: 103613432  
Fitness: 1.600786

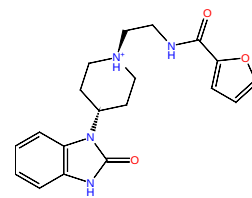

PubChem SID: 104239309  
Fitness: 1.597966

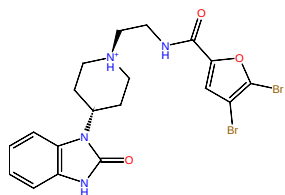

PubChem SID: 104239234  
Fitness: 1.591998

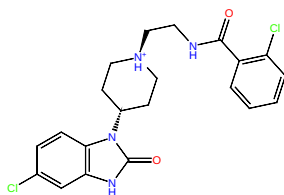

PubChem SID: 104239360  
Fitness: 1.591816

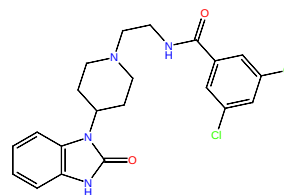

PubChem SID: 104239359  
Fitness: 1.585946

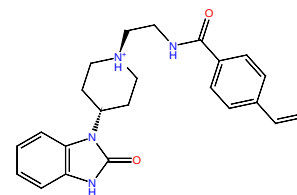

PubChem SID: 104239310  
Fitness: 1.579869

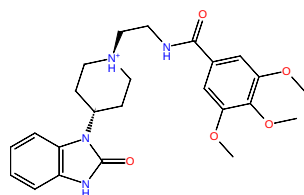

PubChem SID: 104239312  
Fitness: 1.579831

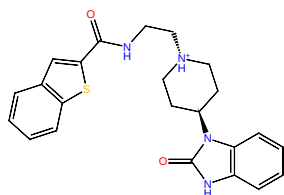

PubChem SID: 103545645  
Fitness: 1.578618

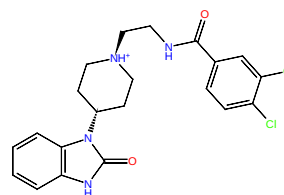

PubChem SID: 104239237  
Fitness: 1.577305

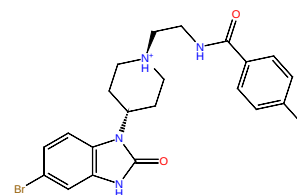

PubChem SID: 103613563  
Fitness: 1.57532

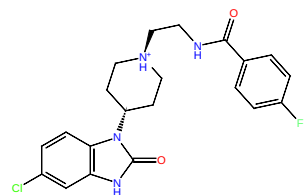

PubChem SID: 103545632  
Fitness: 1.574392

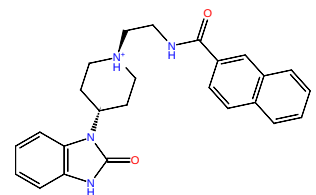

PubChem SID: 103613306  
Fitness: 1.571263

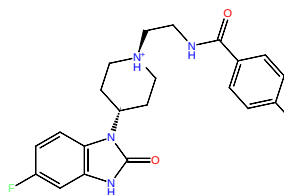

PubChem SID: 103613497  
Fitness: 1.571227

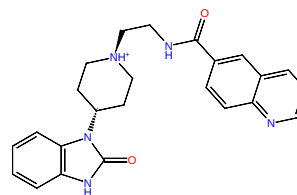

PubChem SID: 103613371  
Fitness: 1.570868

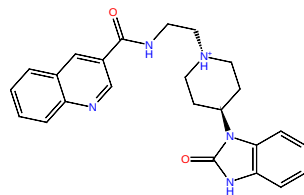

PubChem SID: 103545641  
Fitness: 1.567762

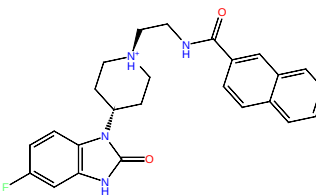

PubChem SID: 103613496  
Fitness: 1.560673

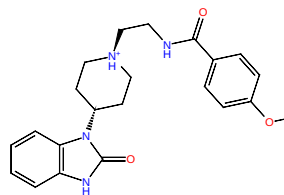

PubChem SID: 104239266  
Fitness: 1.557783

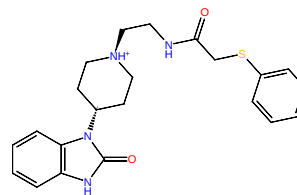

PubChem SID: 104239361  
Fitness: 1.479115

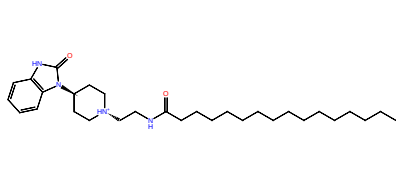

PubChem SID: 104239362  
Fitness: 1.404557

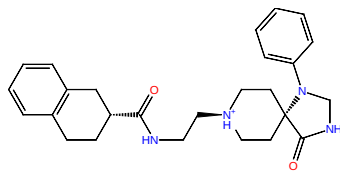

PubChem SID: 103652991  
Fitness: 1.402684

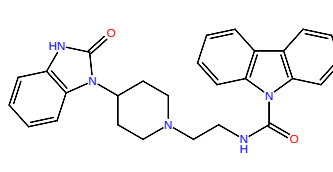

PubChem SID: 104239267  
Fitness: 1.246627

**Supplementary figure 1:** 2D structures of 95 PLD1 active compounds derived from PubChem database.
