# Supplementary material
Source: publisher figshare collection journal article supplement (https://tandf.figshare.com/articles/dataset/_/5579725)

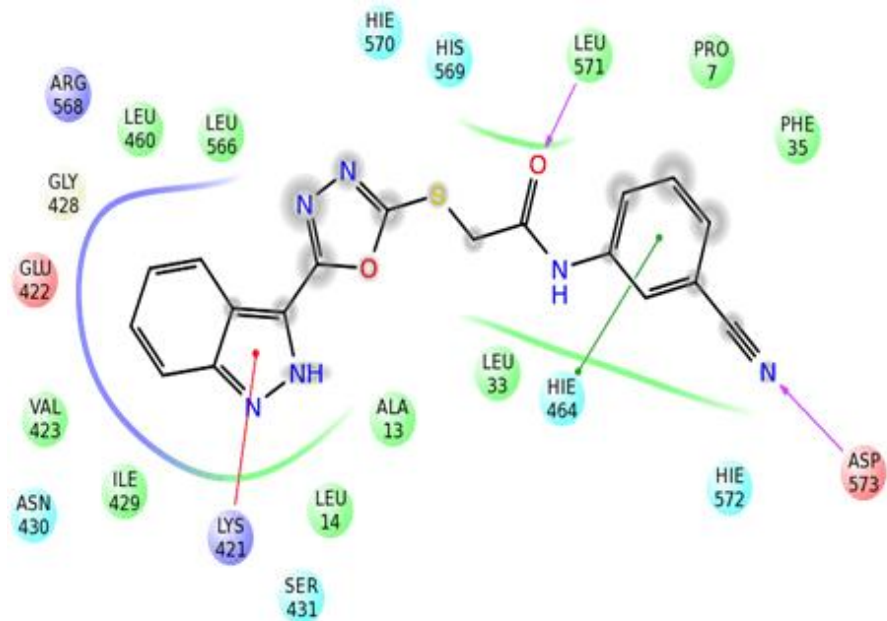

1

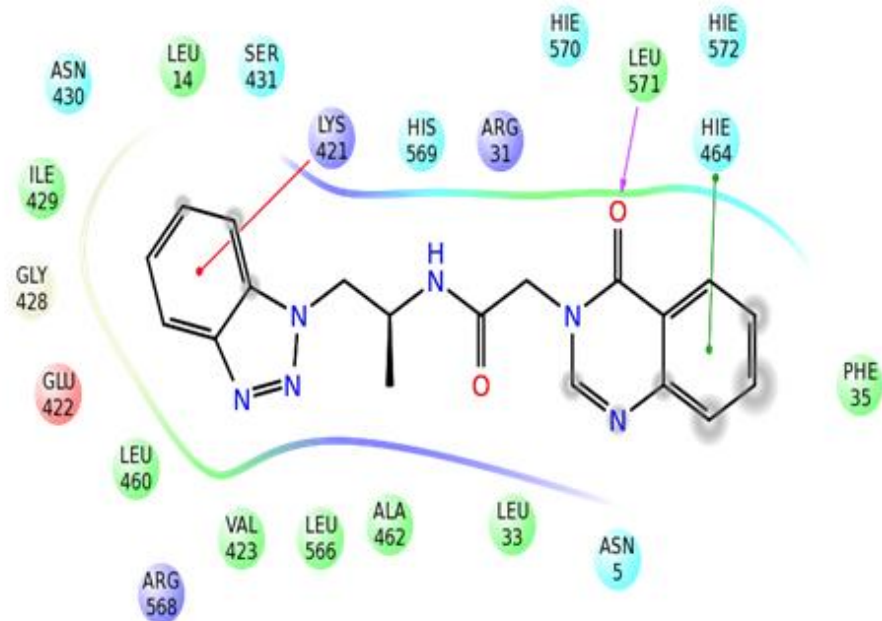

2

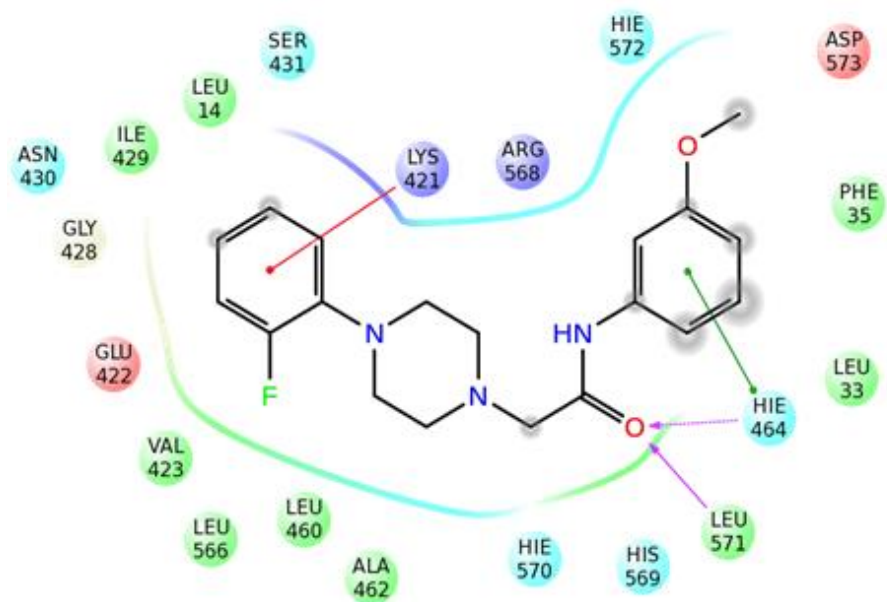

3

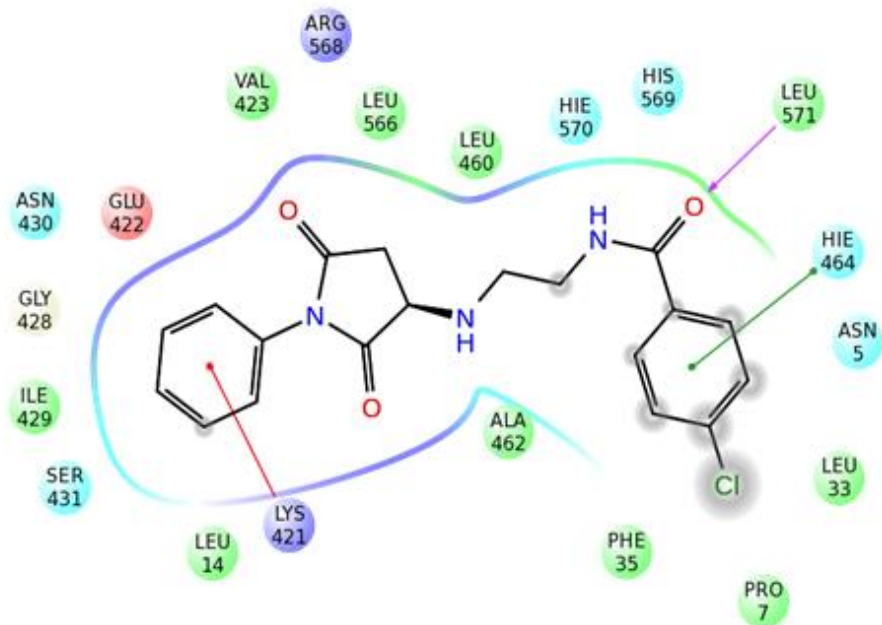

4

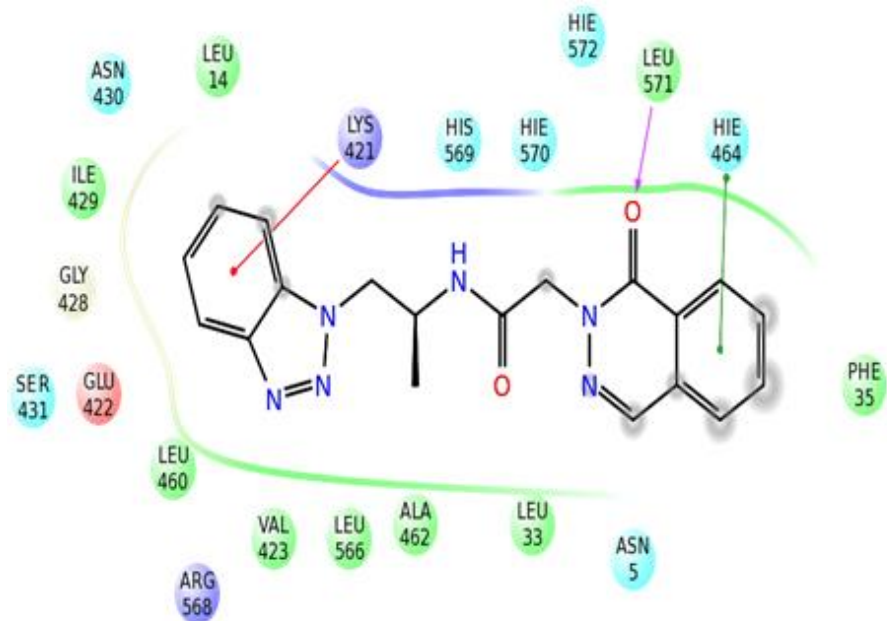

5

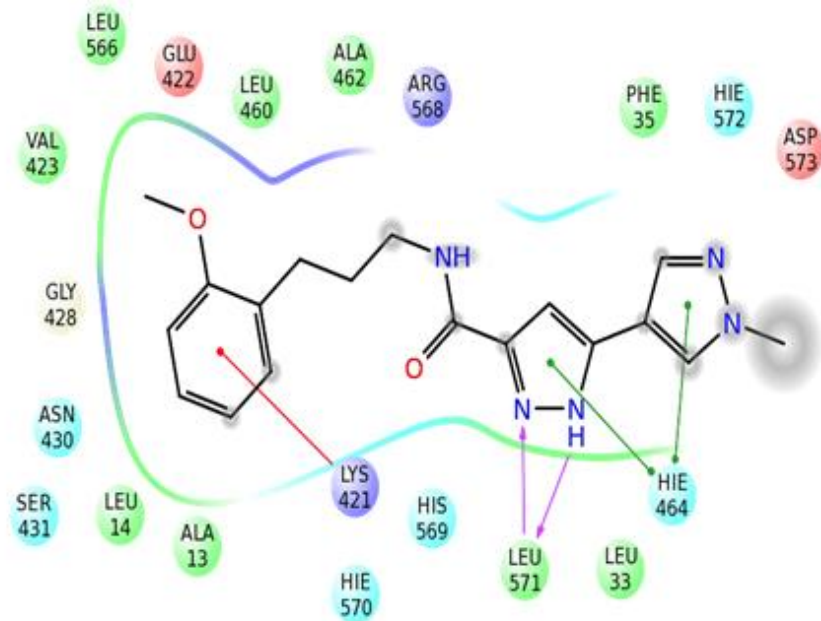

6

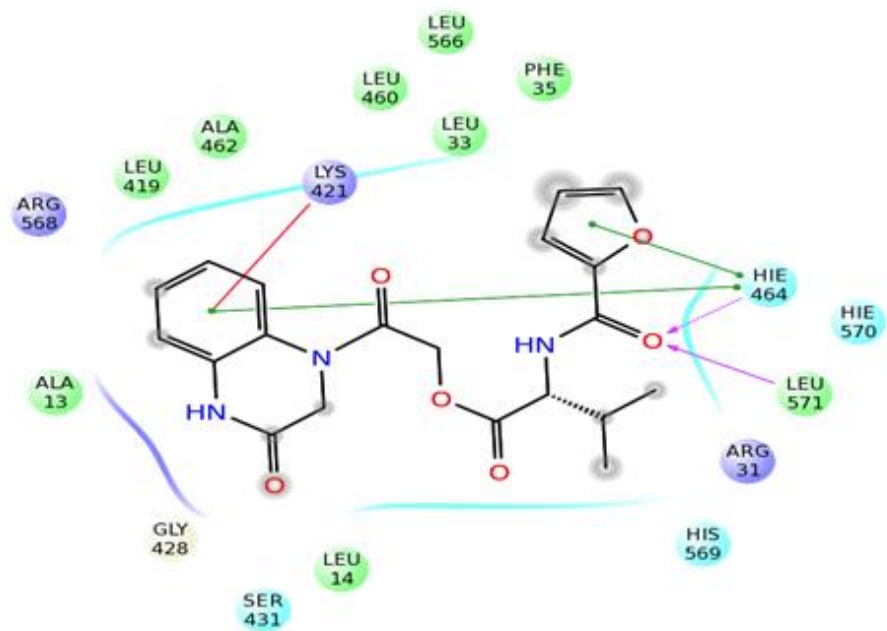

7

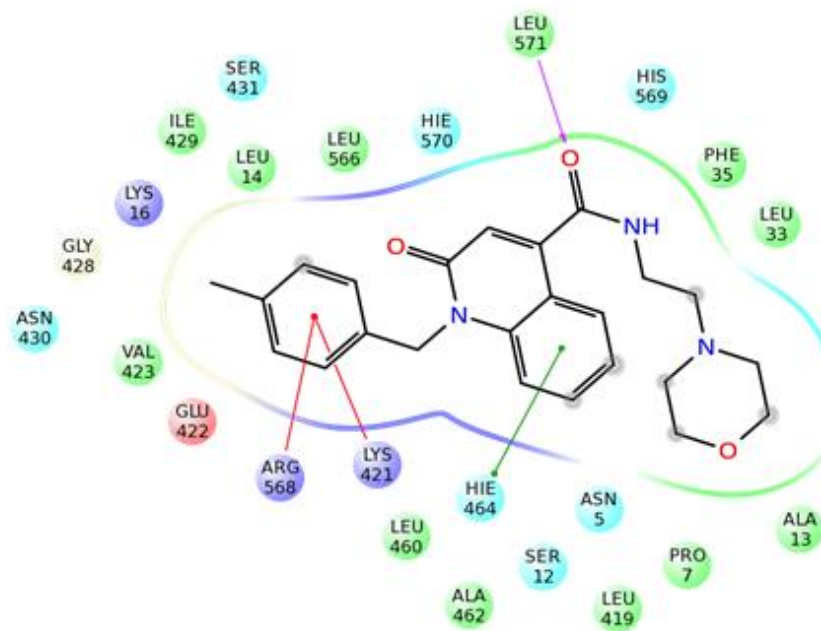

8

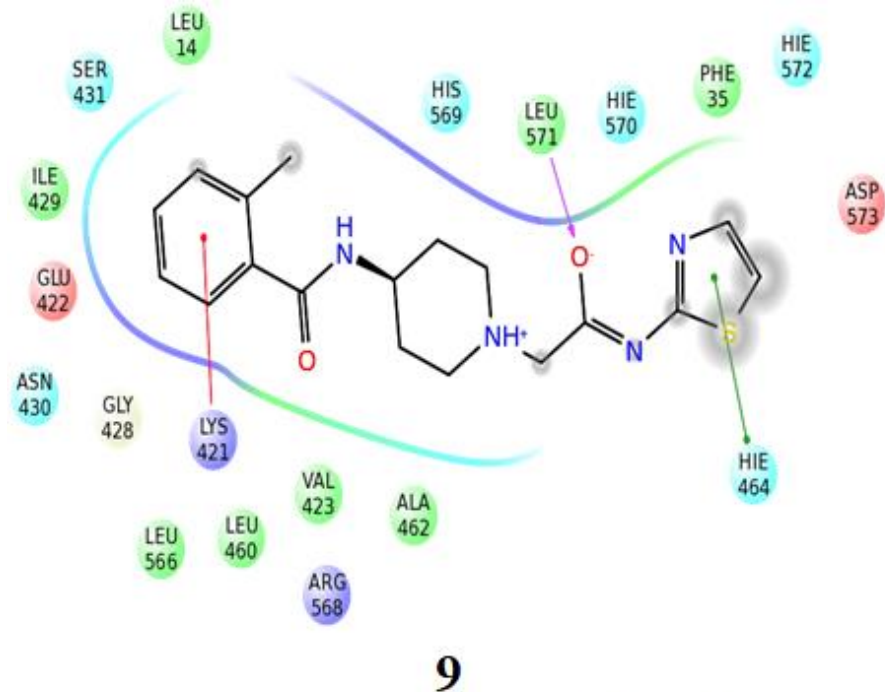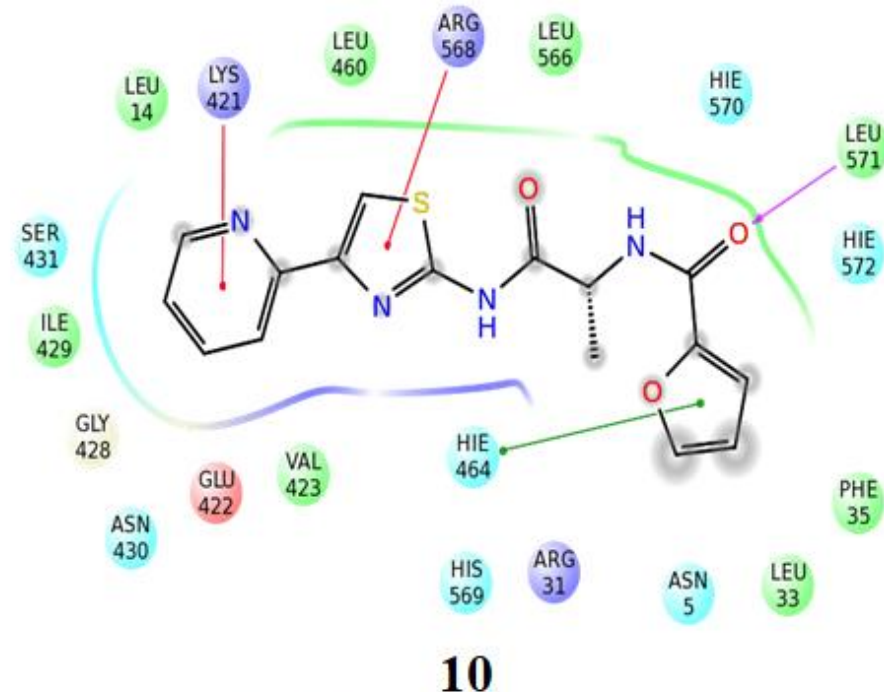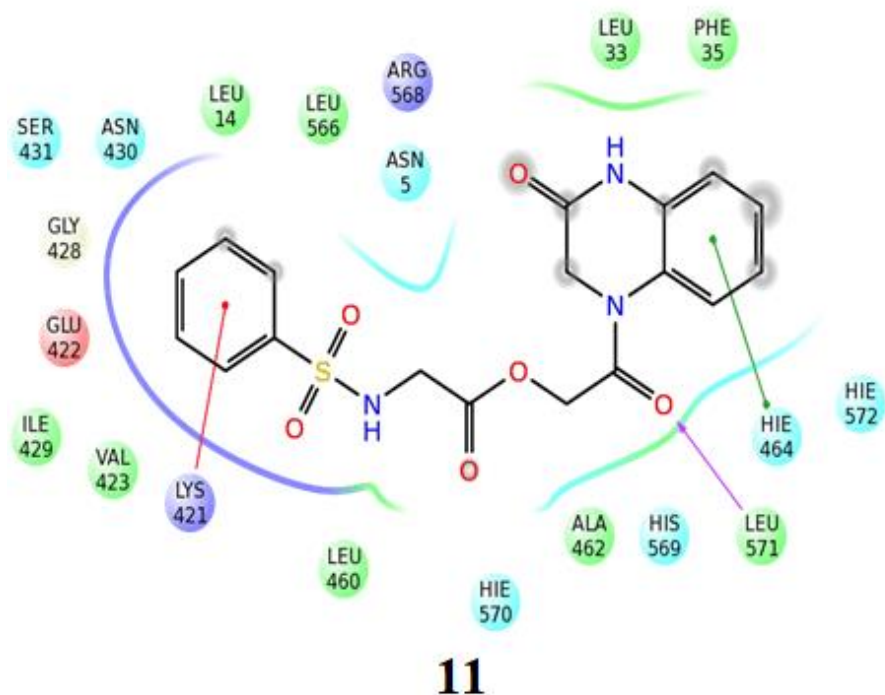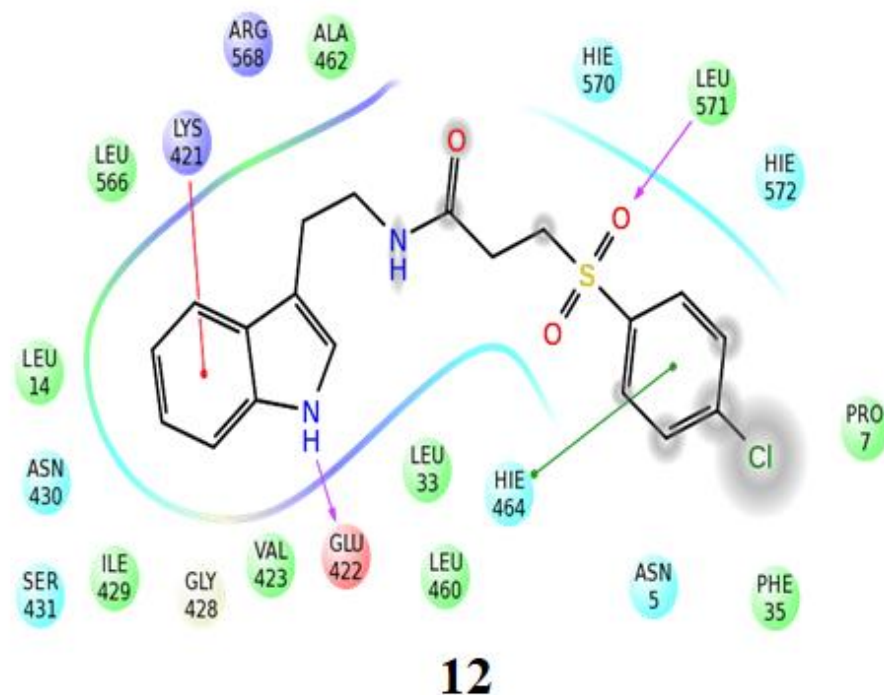

**Supplementary figure 3:** The interaction diagram of 12 compounds with their docking scores.

Supplement: Supplementary file 2 [file 1]
